# Supplementary material for: CXCR6+ NK Cells in Human Fetal Liver and Spleen Possess Unique Phenotypic and Functional Capabilities
Source: PubMed Central journal article supplement (PMC6433986; doi:10.3389/fimmu.2019.00469), 2019-03-19
Supplement: Table_1.pdf [file Table_1.pdf]

## Supplemental Table 1. Antibodies used for multi-parametric flow cytometry

| Marker       | Fluorophore      | clone     | Company        |
|--------------|------------------|-----------|----------------|
| CD3          | BV785            | OKT3      | Biolegend      |
| CD45         | BV605            | HI30      | Biolegend      |
| CD16         | APC/Cy7          | B73.1     | Biolegend      |
| CXCR6        | AF647            | KO41E5    | Biolegend      |
| CD56         | BV421            | HCD56     | Biolegend      |
| CD57         | PE-TX Red        | HNK-1     | Biolegend      |
| CD49e        | FITC             | NKI-SAM1  | Biolegend      |
| NKG2C        | PE               | 134591    | R & D Systems  |
| NKG2D        | BV510            | 1D11      | Biolegend      |
| NKp46        | BV650            | 9E2/NKp46 | BD Biosciences |
| KIR2DL1-DS1  | PE/Cy7           | 11PB6     | Miltenyi       |
| Tbet         | BV711            | 4B10      | Biolegend      |
| EOMES        | PerCP-eFluor 710 | WD1928    | eBioscience    |
| NKG2A        | APC              | 131411    | R & D Systems  |
| CD94         | PerCP/Cy5.5      | DX22      | Biolegend      |
| CD69         | BV650            | FN50      | Biolegend      |
| CD62L        | PE/Cy5           | DREG-56   | Biolegend      |
| CX3CR1       | PE               | 2A9-1     | Biolegend      |
| 41BB         | AF700            | 4B4-1     | BD Biosciences |
| DNAM-1       | BV711            | DX11      | BD Biosciences |
| 2B4          | PerCP/Cy5.5      | C1.7      | Biolegend      |
| CD27         | APC/Cy7          | 0323      | Biolegend      |
| CD11b        | PE/Cy5           | ICRF44    | Biolegend      |
| IFN $\gamma$ | AF700            | 4S.B3     | Biolegend      |
| TNF $\alpha$ | PE/Cy7           | Mab11     | Biolegend      |
| Perforin     | PE               | dG9       | Biolegend      |
| Granzyme B   | BV421            | GB11      | Biolegend      |
| CD107a       | BV786            | H4A3      | BD Biosciences |

## Supplemental Table 2. Gestational ages of fetal tissue

| <u>Sample #</u> | <u>Gestational age</u> |
|-----------------|------------------------|
| <b>FL11</b>     | 17 weeks               |
| <b>FL12</b>     | 17 weeks               |
| <b>FL10</b>     | 18 weeks               |
| <b>FL4</b>      | 19 weeks               |
| <b>FL8</b>      | 19 weeks               |
| <b>FL9</b>      | 19 weeks               |
| <b>FL3</b>      | 20 weeks               |
| <b>FL6</b>      | 21 weeks               |
| <b>FL14</b>     | 23 weeks               |

Supplemental Table 3. Comparison of cytotoxicity and ADCC effector function in Fetal liver and spleen NK compared to PB NK.

| Organs Compared     | Cytotoxicity +/- IL-2 |      |      |      |      |      | ADCC +/- rit |      |      |      |      |      | Statistics |                                                        |
|---------------------|-----------------------|------|------|------|------|------|--------------|------|------|------|------|------|------------|--------------------------------------------------------|
|                     | 3.13                  | 6.25 | 12.5 | 25   | 50   | 100  | 3.13         | 6.25 | 12.5 | 25   | 50   | 100  |            |                                                        |
| Within Fetal Liver  | n.s.                  | n.s. | n.s. | n.s. | n.s. | n.s. | n.s.         | n.s. | n.s. | n.s. | n.s. | n.s. | n.s.       | Two-way ANOVA with Tukey's<br>Multiple Comparison Test |
| Within Fetal Spleen | n.s.                  | n.s. | n.s. | n.s. |      |      | n.s.         | n.s. | n.s. | n.s. |      |      |            |                                                        |
| Within PB           | n.s.                  | n.s. | n.s. | n.s. | *    | *    | n.s.         | n.s. | ***  | **** | **** | **** |            |                                                        |
